# Supplementary figures and images for: A Zn regulated Bi nanosheet catalyst for improving electrochemical CO2 reduction to formate over a wide potential window
Source: Royal Society of Chemistry journal article supplement (doi:10.1039/d4nj00948g), 2024-01-01

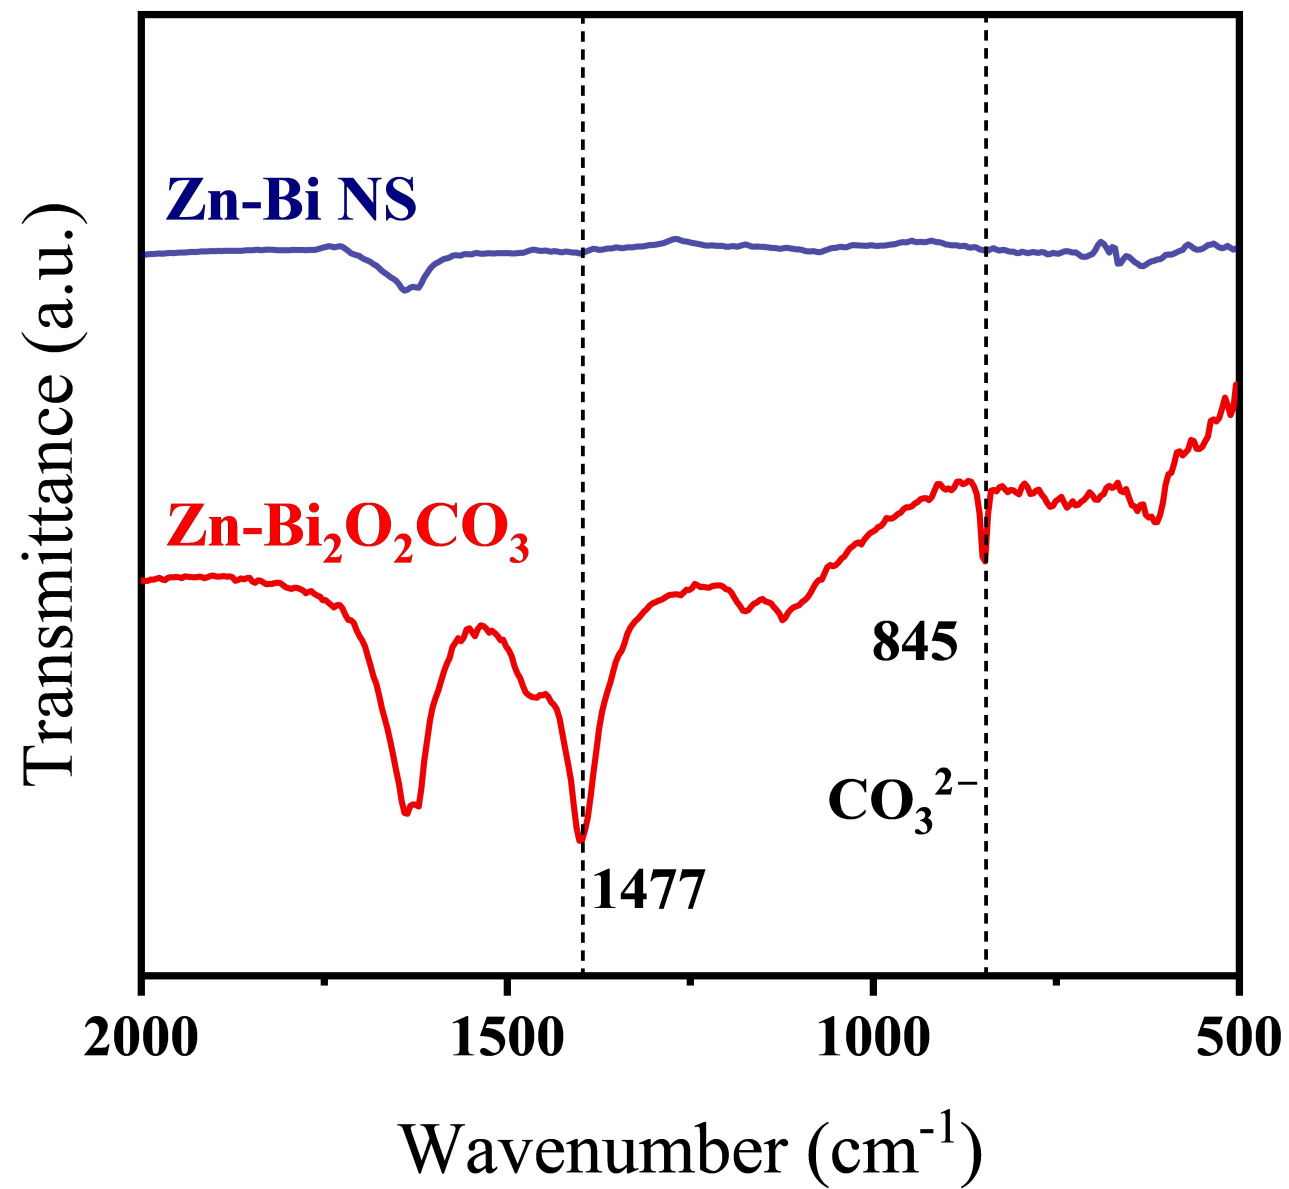

Supplement: d4nj00948g2.pdf [file d4nj00948g2.pdf]

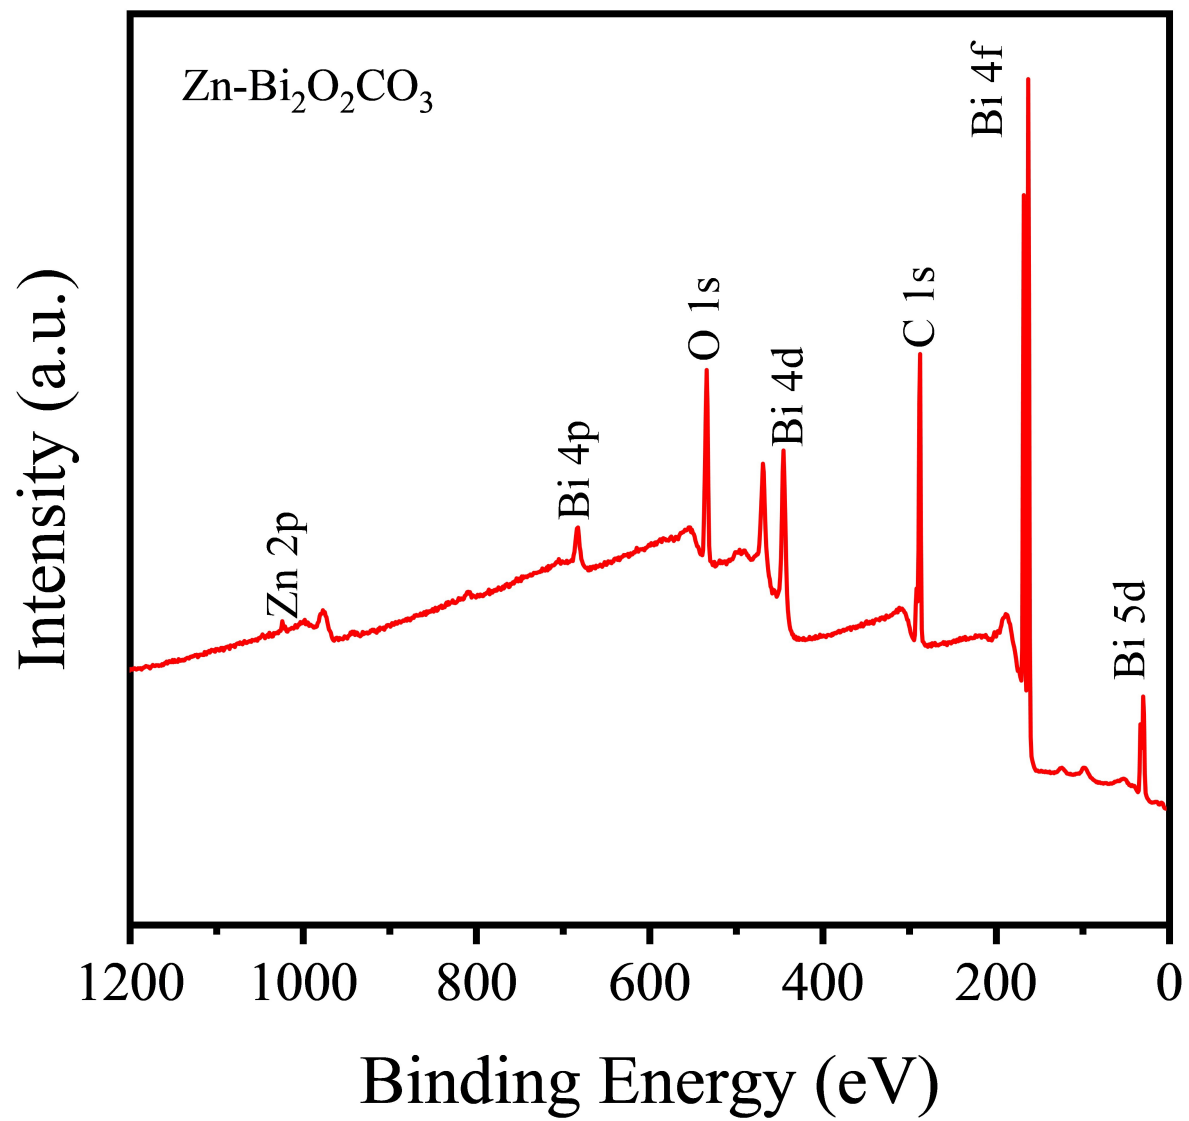

Supplement: d4nj00948g3.pdf [file d4nj00948g3.pdf]

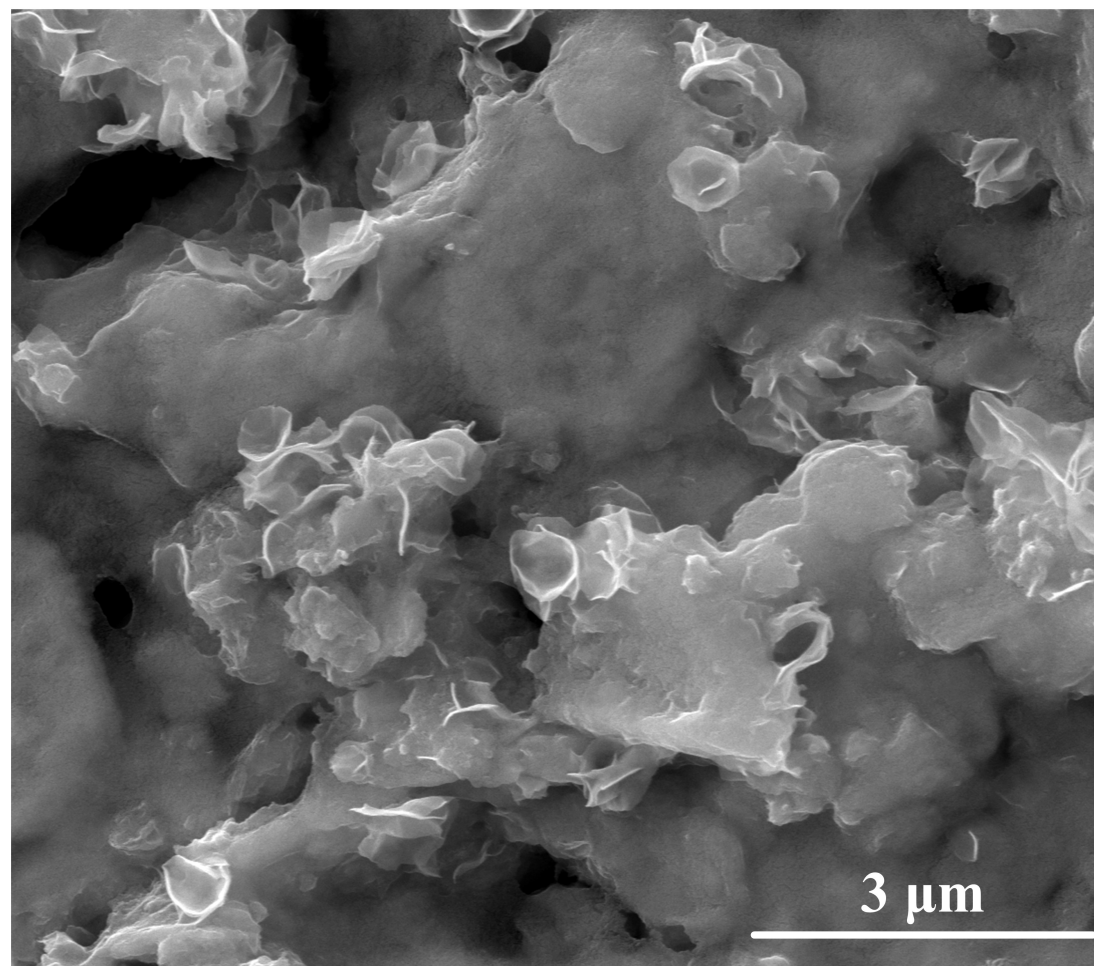

Supplement: d4nj00948g4.pdf [file d4nj00948g4.pdf]
